# Supplementary material
Source: publisher figshare collection journal article supplement (https://frontiersin.figshare.com/ndownloader/files/13868207)
Supplement: Supplementary file [file 13868207]

**Supplementary Table 3. Brain Sample Characteristics for Rett Syndrome (RTT) patients and controls.**

| <b>NIH NeurobaioBank Sample Number #</b>      | <b><i>MECP2</i> Mutation</b> | <b>Known Disease</b>          | <b>Age (Y.D)</b> | <b>PMI</b> | <b>Storage (Y.D)<br/>(Prior arriving to our lab)</b> | <b>Cause of Death<br/>(When known)</b> |
|-----------------------------------------------|------------------------------|-------------------------------|------------------|------------|------------------------------------------------------|----------------------------------------|
| NA/organ donation                             | T158M                        | Rett Syndrome                 | >12              | < 6 h      | Less than two weeks                                  | Respiratory failure                    |
| NIH # 4516                                    | R255X                        | Rett Syndrome                 | 20.356           | 9h         | 11.360                                               | Natural                                |
| NIH # 4882                                    | R255X                        | Rett Syndrome                 | 17.310           | 18 h       | 9.131                                                | Complication of Disorder               |
| NIH # 4852                                    | G451T                        | Rett Syndrome                 | 19.280           | 13h        | 9.357                                                | Seizures                               |
| NA/provided by Dr. Marc Del Bigio (co-author) | Control                      | Unaffected                    | 14               | 24 h       | 2 weeks                                              | Hanging                                |
| 1347                                          | Control                      | Unaffected                    | 19.76            | 16h        | 14.336                                               | Accidental-multiple injuries           |
| 5646                                          | Control                      | Acute reactive airway disease | 20.163           | 23h        | 2.308                                                | Medical                                |
| 5446                                          | Control                      | Reactive airway disease       | 17.117           | 18h        | 4.58                                                 | Natural cause                          |

PMI: Post-mortem interval

Y.D: Year.Day
